# Supplementary material
Source: PubMed Central journal article supplement (PMC8248519)
Supplement: NIHMS1633002-supplement-sm1.pdf [file NIHMS1633002-supplement-sm1.pdf]

# ADVANCED FUNCTIONAL MATERIALS

## Supporting Information

for *Adv. Funct. Mater.*, DOI: 10.1002/adfm.202003237

Coupling Nanostructured Microchips with Covalent Chemistry Enables Purification of Sarcoma-Derived Extracellular Vesicles for Downstream Functional Studies

*Jiantong Dong, Ryan Y. Zhang, Na Sun, Junhui Hu, Matthew D. Smalley, Anqi Zhou, Yue Hua, Winston Rothermich, Mengxiang Chen, Jiayuan Chen, Jinglei Ye, Pai-Chi Teng, Dongping Qi, Jeffrey A. Toretzky, James S. Tomlinson, Mengyuan Li, Paul S. Weiss, Steven J. Jonas, Noah Federman, Lily Wu, Meiping Zhao, \* Hsian-Rong Tseng, \* and Yazhen Zhu\**

## Supporting Information

### **Coupling Nanostructured Microchips with Covalent Chemistry Enables Purification of Sarcoma-Derived Extracellular Vesicles for Downstream Functional Studies**

*Jiantong Dong, Ryan Y. Zhang, Na Sun, Junhui Hu, Matthew D. Smalley, Anqi Zhou, Yue Hua, Winston Rothermich, Mengxiang Chen, Jiayuan Chen, Jinglei Ye, Pai-Chi Teng, Dongping Qi, Jeffrey A. Toretzky, James S. Tomlinson, Mengyuan Li, Paul S. Weiss, Steven J. Jonas, Noah Federman, Lily Wu, Meiping Zhao,\* Hsian-Rong Tseng,\* and Yazhen Zhu\**

#### **This file includes:**

- Figure S1. A 3-step chemical modification process of SiNWS.
- Figure S2. Photograph and schematic of automated fluidic handler and chip holder.
- Figure S3. Size distributions of EVs before capture and after release measured by DLS.
- Figure S4. Capture capacity of ES-EV Click Chips was examined by introducing different amounts of A673 EVs into the devices, followed by the quantification of EV-derived RNA.
- Figure S5. Schematic diagram of EWS rearrangements and RT-ddPCR quantification.
- Figure S6. Linear correlation between the copy number of EWS-FLI1 type 1 rearrangement and the amount of A673 EV-derived RNA.
- Figure S7. Fluorescence images of negative controls of EV uptake study.
- Table S1. DNA sequence of primers and probes for the detection of EWS rearrangements.
- Table S2. Standard deviation (SD) and coefficient of variation (CV) of ES-EV Click Chips.
- Table S3. Clinical characteristics and EV-based detection of EWS rearrangements of the Ewing sarcoma (ES) patients and healthy donors (HDs).

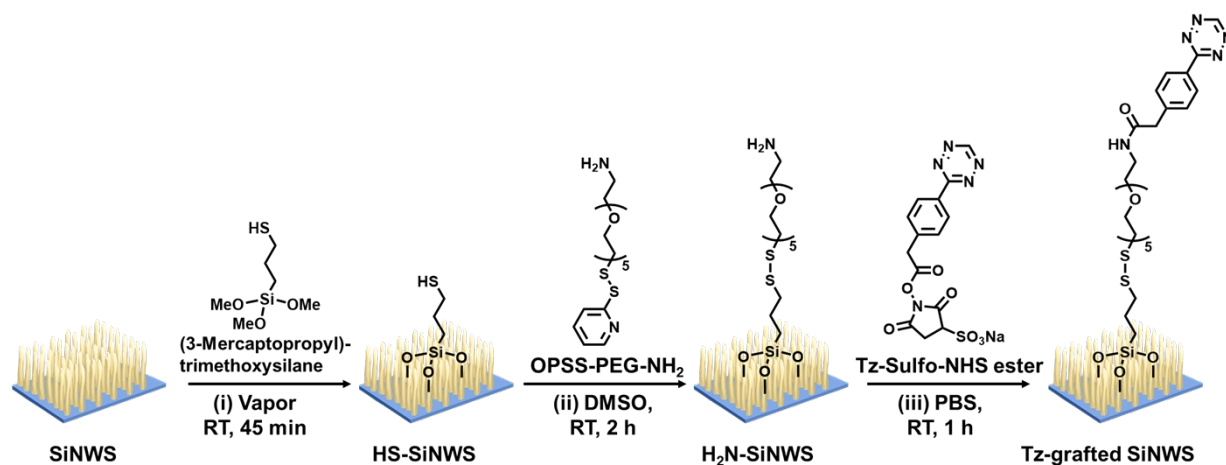

**Figure S1.** A 3-step Chemical modification process of Si nanowire substrates (SiNWS): (i) vapor deposition of (3-mercaptopropyl) trimethoxysilane to give HS-SiNWS; (ii) incorporation of a disulfide linker via ortho-pyridyl disulfide polyethylene glycol amine (OPSS-PEG-NH<sub>2</sub>) to give H<sub>2</sub>N-SiNWS; and (iii) NHS ester reaction between Tz-sulfo-NHS ester and the terminal primary amine group to generate the Tz-grafted SiNWS.

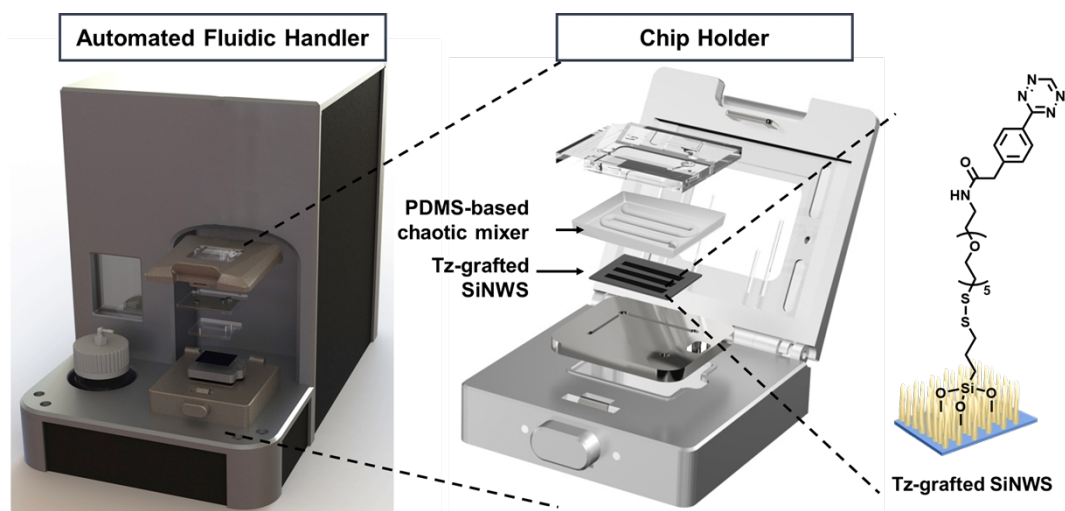

**Figure S2.** Photograph and schematic of an automated fluidic handler and a chip holder. The fully automated digital fluidic handling system (left) is composed of rotary valves, two PSD4 syringe pumps (Hamilton Robotics), and a controller program with a graphical user interface that was used to control the loading of reagents and test samples. The chip holder (middle) is used to integrate Tz-grafted SiNWS and PDMS-based chaotic mixer to make a complete ES-EV Click chip.

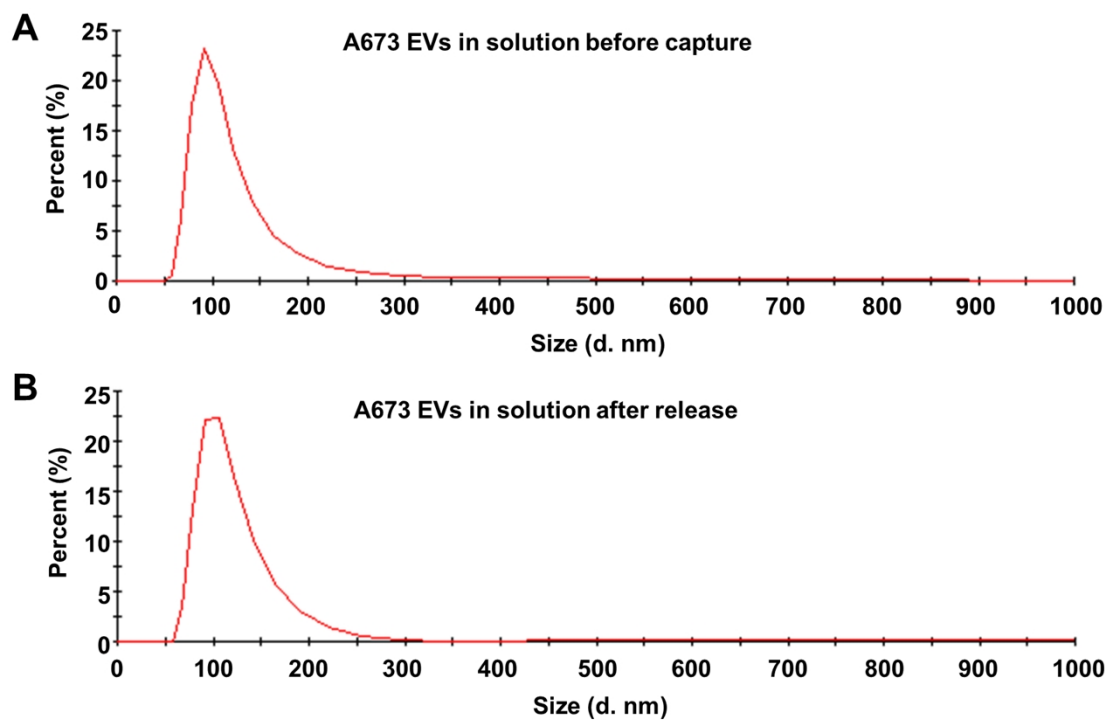

**Figure S3.** Size distributions of EVs before capture and after release measured by dynamic light scattering (DLS). (A) The size distribution of A673 EVs in solution before capture study. (B) The size distribution of A673 EVs in solution after release.

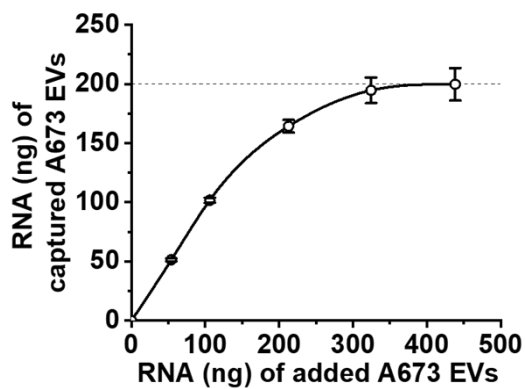

**Figure S4.** Capture capacity of ES-EV Click Chips was examined by introducing different amounts of A673 EVs into the devices, followed by the quantification of EV-derived RNA. The ES-EV Click Chips were saturated after capturing a quantity of A673 EVs, which were lysed to obtain 200 ng of EV-derived RNA.

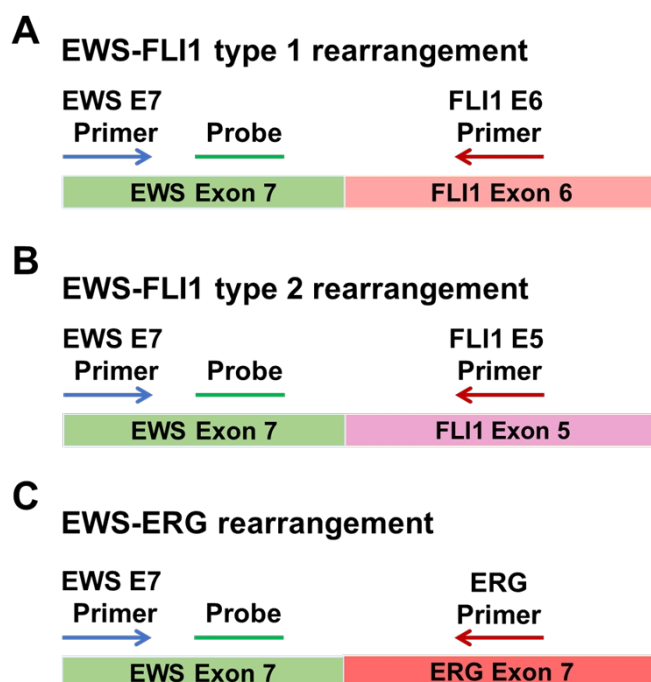

**Figure S5.** Schematic diagram of EWS rearrangements and RT-ddPCR quantification. (A) EWS-FLI1 type 1 rearrangement in A673 cells and A673 cell-derived EVs. (B) EWS-FLI1 type 2 rearrangement in SK-ES-1 cells and SK-ES-1 cell-derived EVs. (C) EWS-ERG rearrangement in ES-5838 cells and ES-5838 cell-derived EVs.

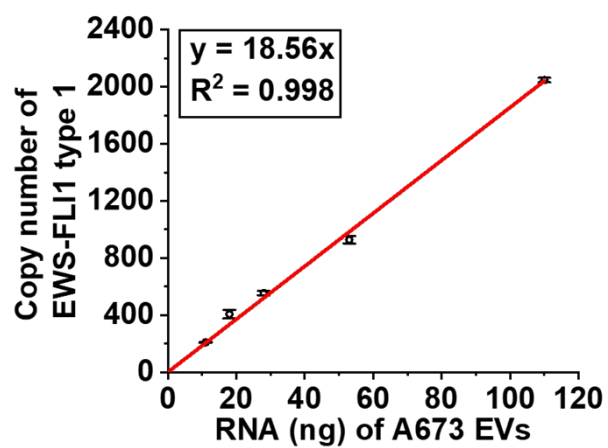

**Figure S6.** Linear correlation between the copy number of EWS-FLI1 type 1 rearrangement and the amount of A673 EV-derived RNA ( $n = 3$ ).



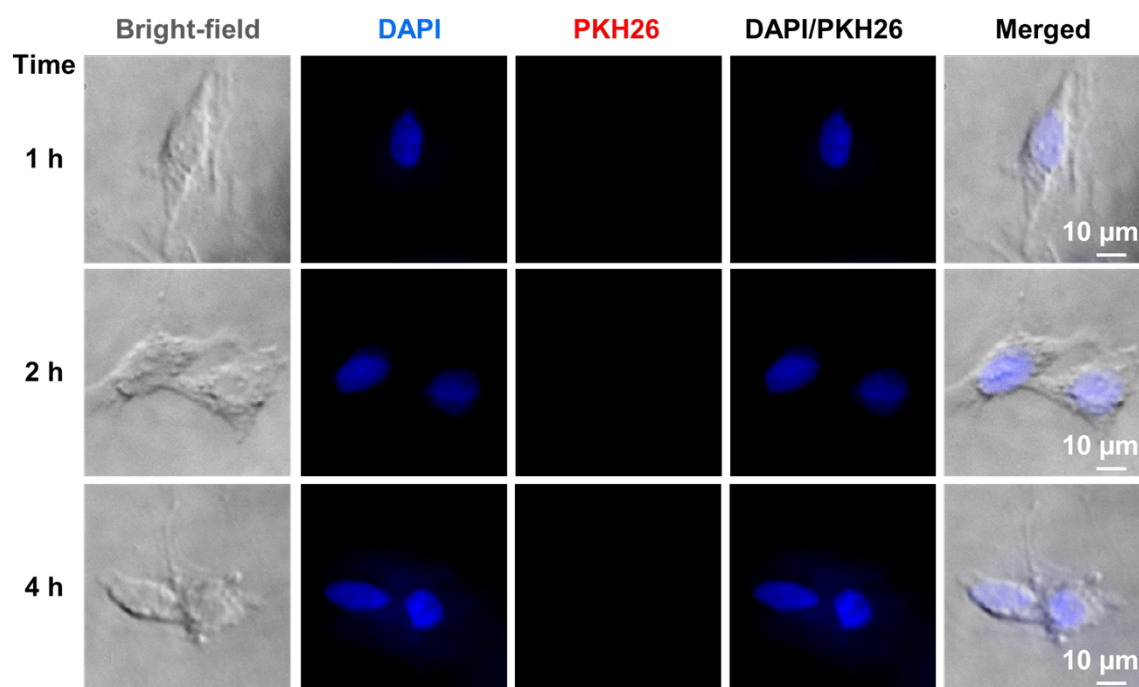

**Figure S7.** Fluorescence images of negative controls of EV uptake study. The PKH26 negative control samples (without ES-5838 EVs) were purified by ES-EV Click Chips and co-cultured with A673 cells for 1, 2, and 4 h, respectively. Nuclei (blue) of A673 cells are stained with DAPI. No red fluorescence signal was observed in these A673 cells.

**Table S1.** DNA sequence of primers and probes for the detection of EWS rearrangements.

| EWS rearrangements | Amplicon length (bp) | Primers /probes | DNA sequence (5'→3')            |
|--------------------|----------------------|-----------------|---------------------------------|
| EWS-FLI1 type 1    | 76                   | Forward         | CTA CAG CCA AGC TCC AAG TC      |
|                    |                      | Reverse         | GAC TGA GTC ATA AGA AGG GTT CTG |
|                    |                      | Probe           | TAG CCA ACA GAG CAG CAG         |
| EWS-FLI1 type 2    | 104                  | Forward         | CTA CAG CCA AGC TCC AAG TC      |
|                    |                      | Reverse         | GTG AGG ATT GGT CGG TGT G       |
|                    |                      | Probe           | TAG CCA ACA GAG CAG CAG         |
| EWS-ERG            | 97                   | Forward         | CTA CAG CCA AGC TCC AAG TC      |
|                    |                      | Reverse         | ACC GGT CCA GGC TGA T           |
|                    |                      | Probe           | TAG CCA ACA GAG CAG CAG         |

**Table S2.** Standard deviation (SD) and coefficient of variation (CV) of ES-EV Click Chips.

| Evaluation index     | Test 1 | Test 2 | Test 3 | Test 4 | Test 5 | Mean | SD   | CV% |
|----------------------|--------|--------|--------|--------|--------|------|------|-----|
| Isolation efficiency | 88%    | 87%    | 93%    | 90%    | 97%    | 91%  | 3.6% | 4.0 |

**Table S3.** Clinical characteristics and EV-based detection of EWS rearrangements of the Ewing sarcoma (ES) patients and healthy donors (HDs).

| Patient No. | Gender | Age <sup>a</sup> | Clinical stage   | FISH test on tissue | Gene status in EVs <sup>b</sup> | EWS rearrangement in EVs (copies) <sup>c</sup> | Blood drawing timepoint |
|-------------|--------|------------------|------------------|---------------------|---------------------------------|------------------------------------------------|-------------------------|
| ES1         | Male   | 19 (Y)           | IV               | EWS rearrangement   | EWS-FLI1 (Type 1)               | 216                                            | Treatment-naïve         |
| ES2         | Male   | 12 (Y)           | IV               | EWS rearrangement   | EWS-FLI1 (Type 2)               | 35                                             | Under salvage treatment |
| ES3         | Male   | 10 (M)           | IV               | EWS rearrangement   | EWS-FLI1 (Type 2)               | 82                                             | Treatment-naïve         |
| ES4         | Male   | 18 (Y)           | IV (Recurrent)   | EWS rearrangement   | EWS-FLI1 (Type 2)               | 36                                             | Under salvage treatment |
| HD1         | Male   | 18 (Y)           | N/A <sup>b</sup> | N/A                 | N/A                             | 0                                              | N/A                     |
| HD2         | Male   | 20 (Y)           | N/A              | N/A                 | N/A                             | 0                                              | N/A                     |
| HD3         | Male   | 21 (Y)           | N/A              | N/A                 | N/A                             | 0                                              | N/A                     |
| HD4         | Male   | 31 (Y)           | N/A              | N/A                 | N/A                             | 0                                              | N/A                     |

<sup>a</sup>Y: years. M: months. <sup>b</sup>N/A: not available. <sup>c</sup>per 0.3 mL plasma.

*ES Patient Enrollment and Blood Sample Collection.* We enrolled four ES patients (stages IV) and four HDs in May 2018 and June 2020 at UCLA under IRB #00000173. This study was approved by the Ethics Committee of UCLA and written informed consent for this study was obtained for each patient. A 10-mL peripheral venous blood sample was collected in a BD Vacutainer™ Plastic Blood Collection Tube with K2EDTA (BD Medical, Cat. #366643, Thermo Fisher Scientific). Blood samples were centrifuged at 300 g for 5 min and subsequently at 2,000 g for 5 min at 4 °C. The plasma was collected, aliquoted, and stored at –80 °C. For each study, 0.3 mL of plasma was centrifuged at 3,000 g for 15 min to remove cell debris and run through the ES-EV Click Chip under the optimal condition.
